# Supplementary material
Source: Research Square preprint supplement (doi:10.21203/rs.3.rs-9498065/v1)
Supplement: Supplementary file 1 [file f399e1cff2d983ecaf15f6cc.docx]

| 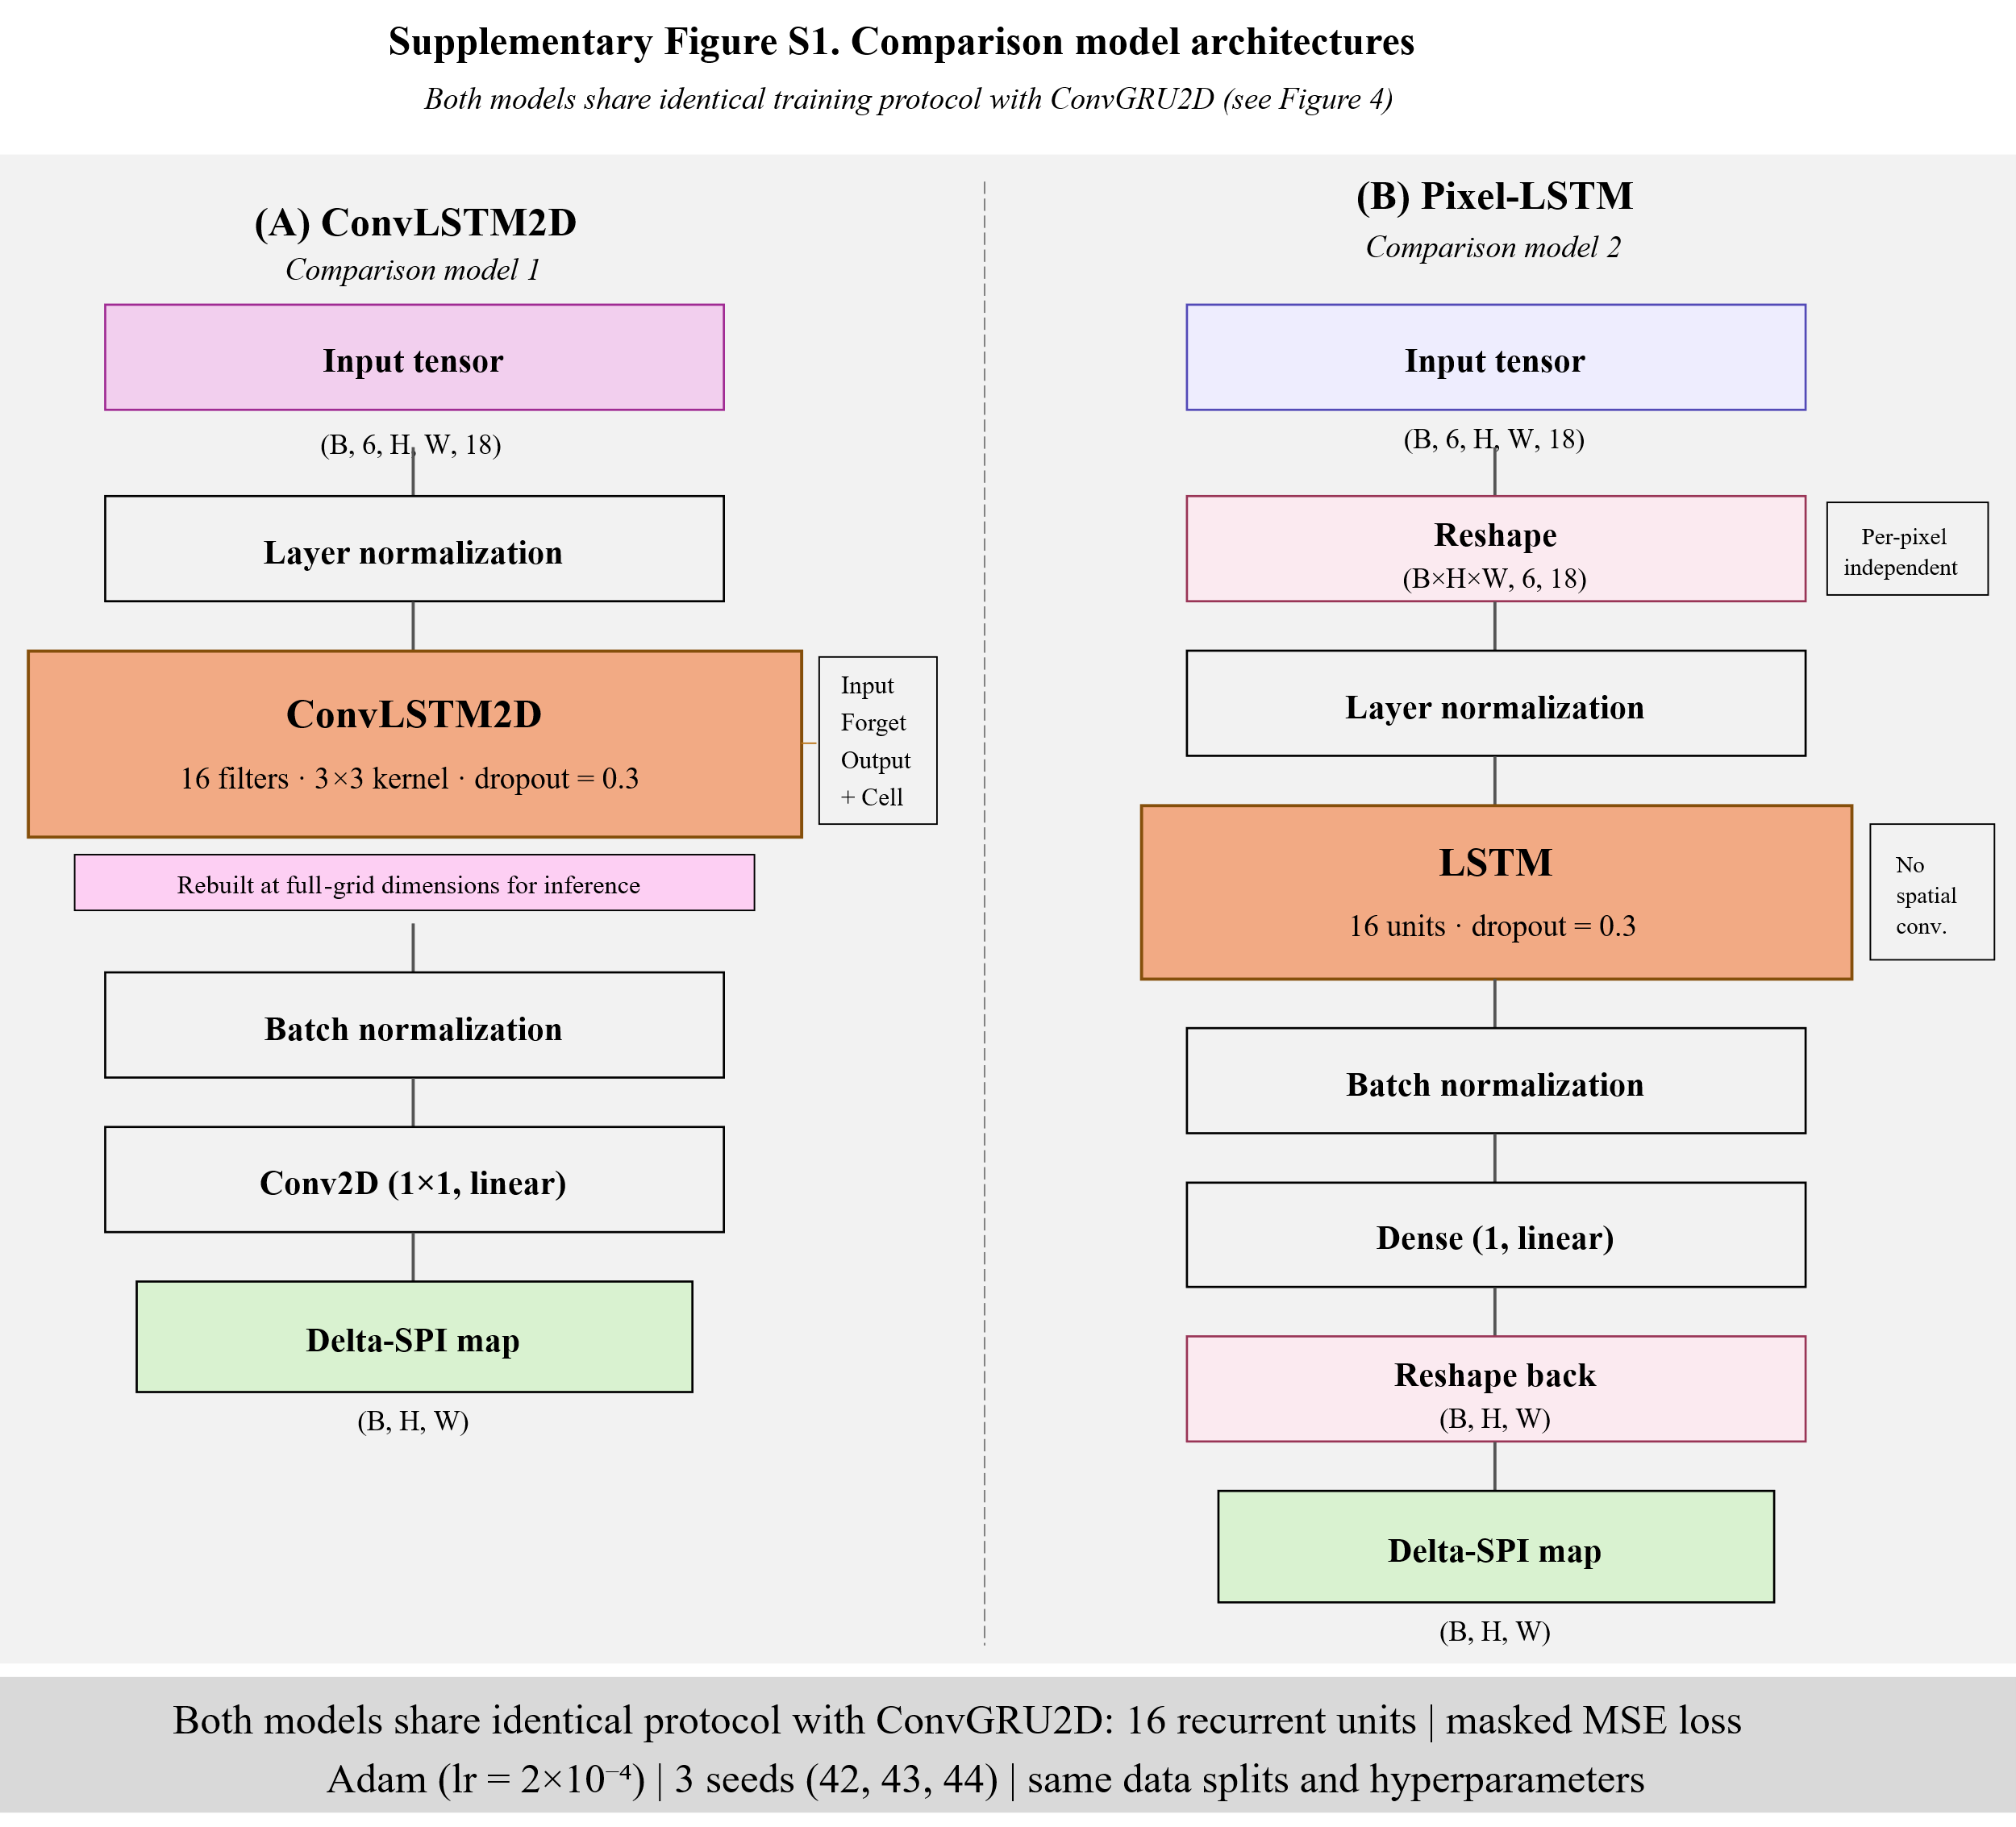 |
| --- |
| **Figure S1.** Comparison model architectures. (A) ConvLSTM2D replaces the two-gate ConvGRU cell with a three-gate ConvLSTM cell (input, forget, output) maintaining an additional cell state. The model is rebuilt at full-grid dimensions for test-time inference with trained weights transferred. (B) Pixel-LSTM removes spatial convolution by reshaping the input into per-pixel temporal sequences, applying a standard LSTM independently at each grid cell, and reshaping the output back to map form. Both models share identical training protocols with ConvGRU2D: 16 recurrent units, masked MSE loss, Adam optimizer (lr = 2x10-4), three random seeds (42, 43, 44), and identical data splits. |

**Supplementary material**

| 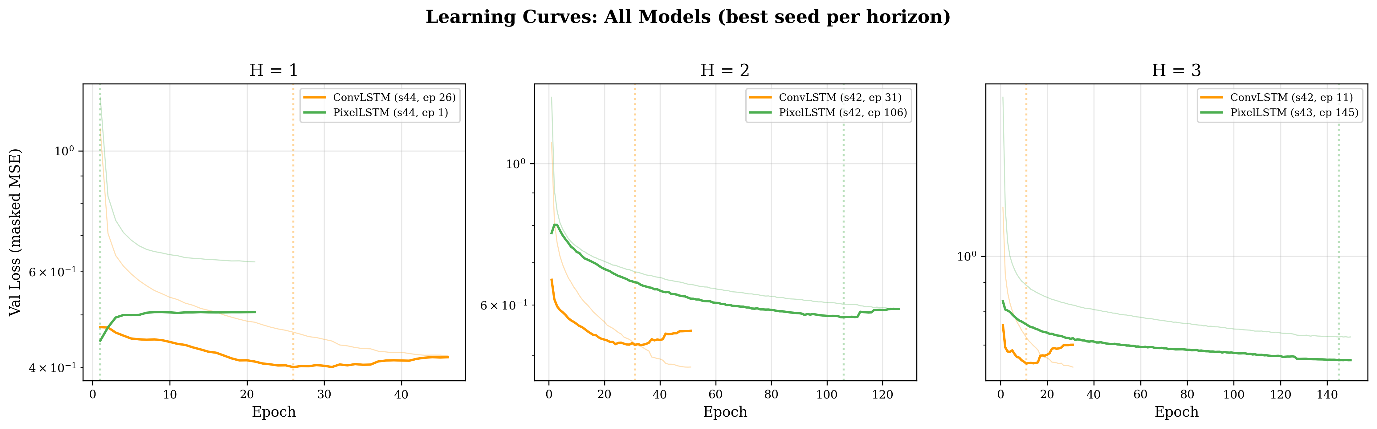 |
| --- |
| **Figure S2.** Validation loss curves for ConvLSTM2D and Pixel-LSTM (best seed per horizon). ConvLSTM2D exhibits erratic convergence behavior at H = 3, while several Pixel-LSTM runs failed to train beyond epoch 1, reflecting training instability when spatial context is removed. |

| 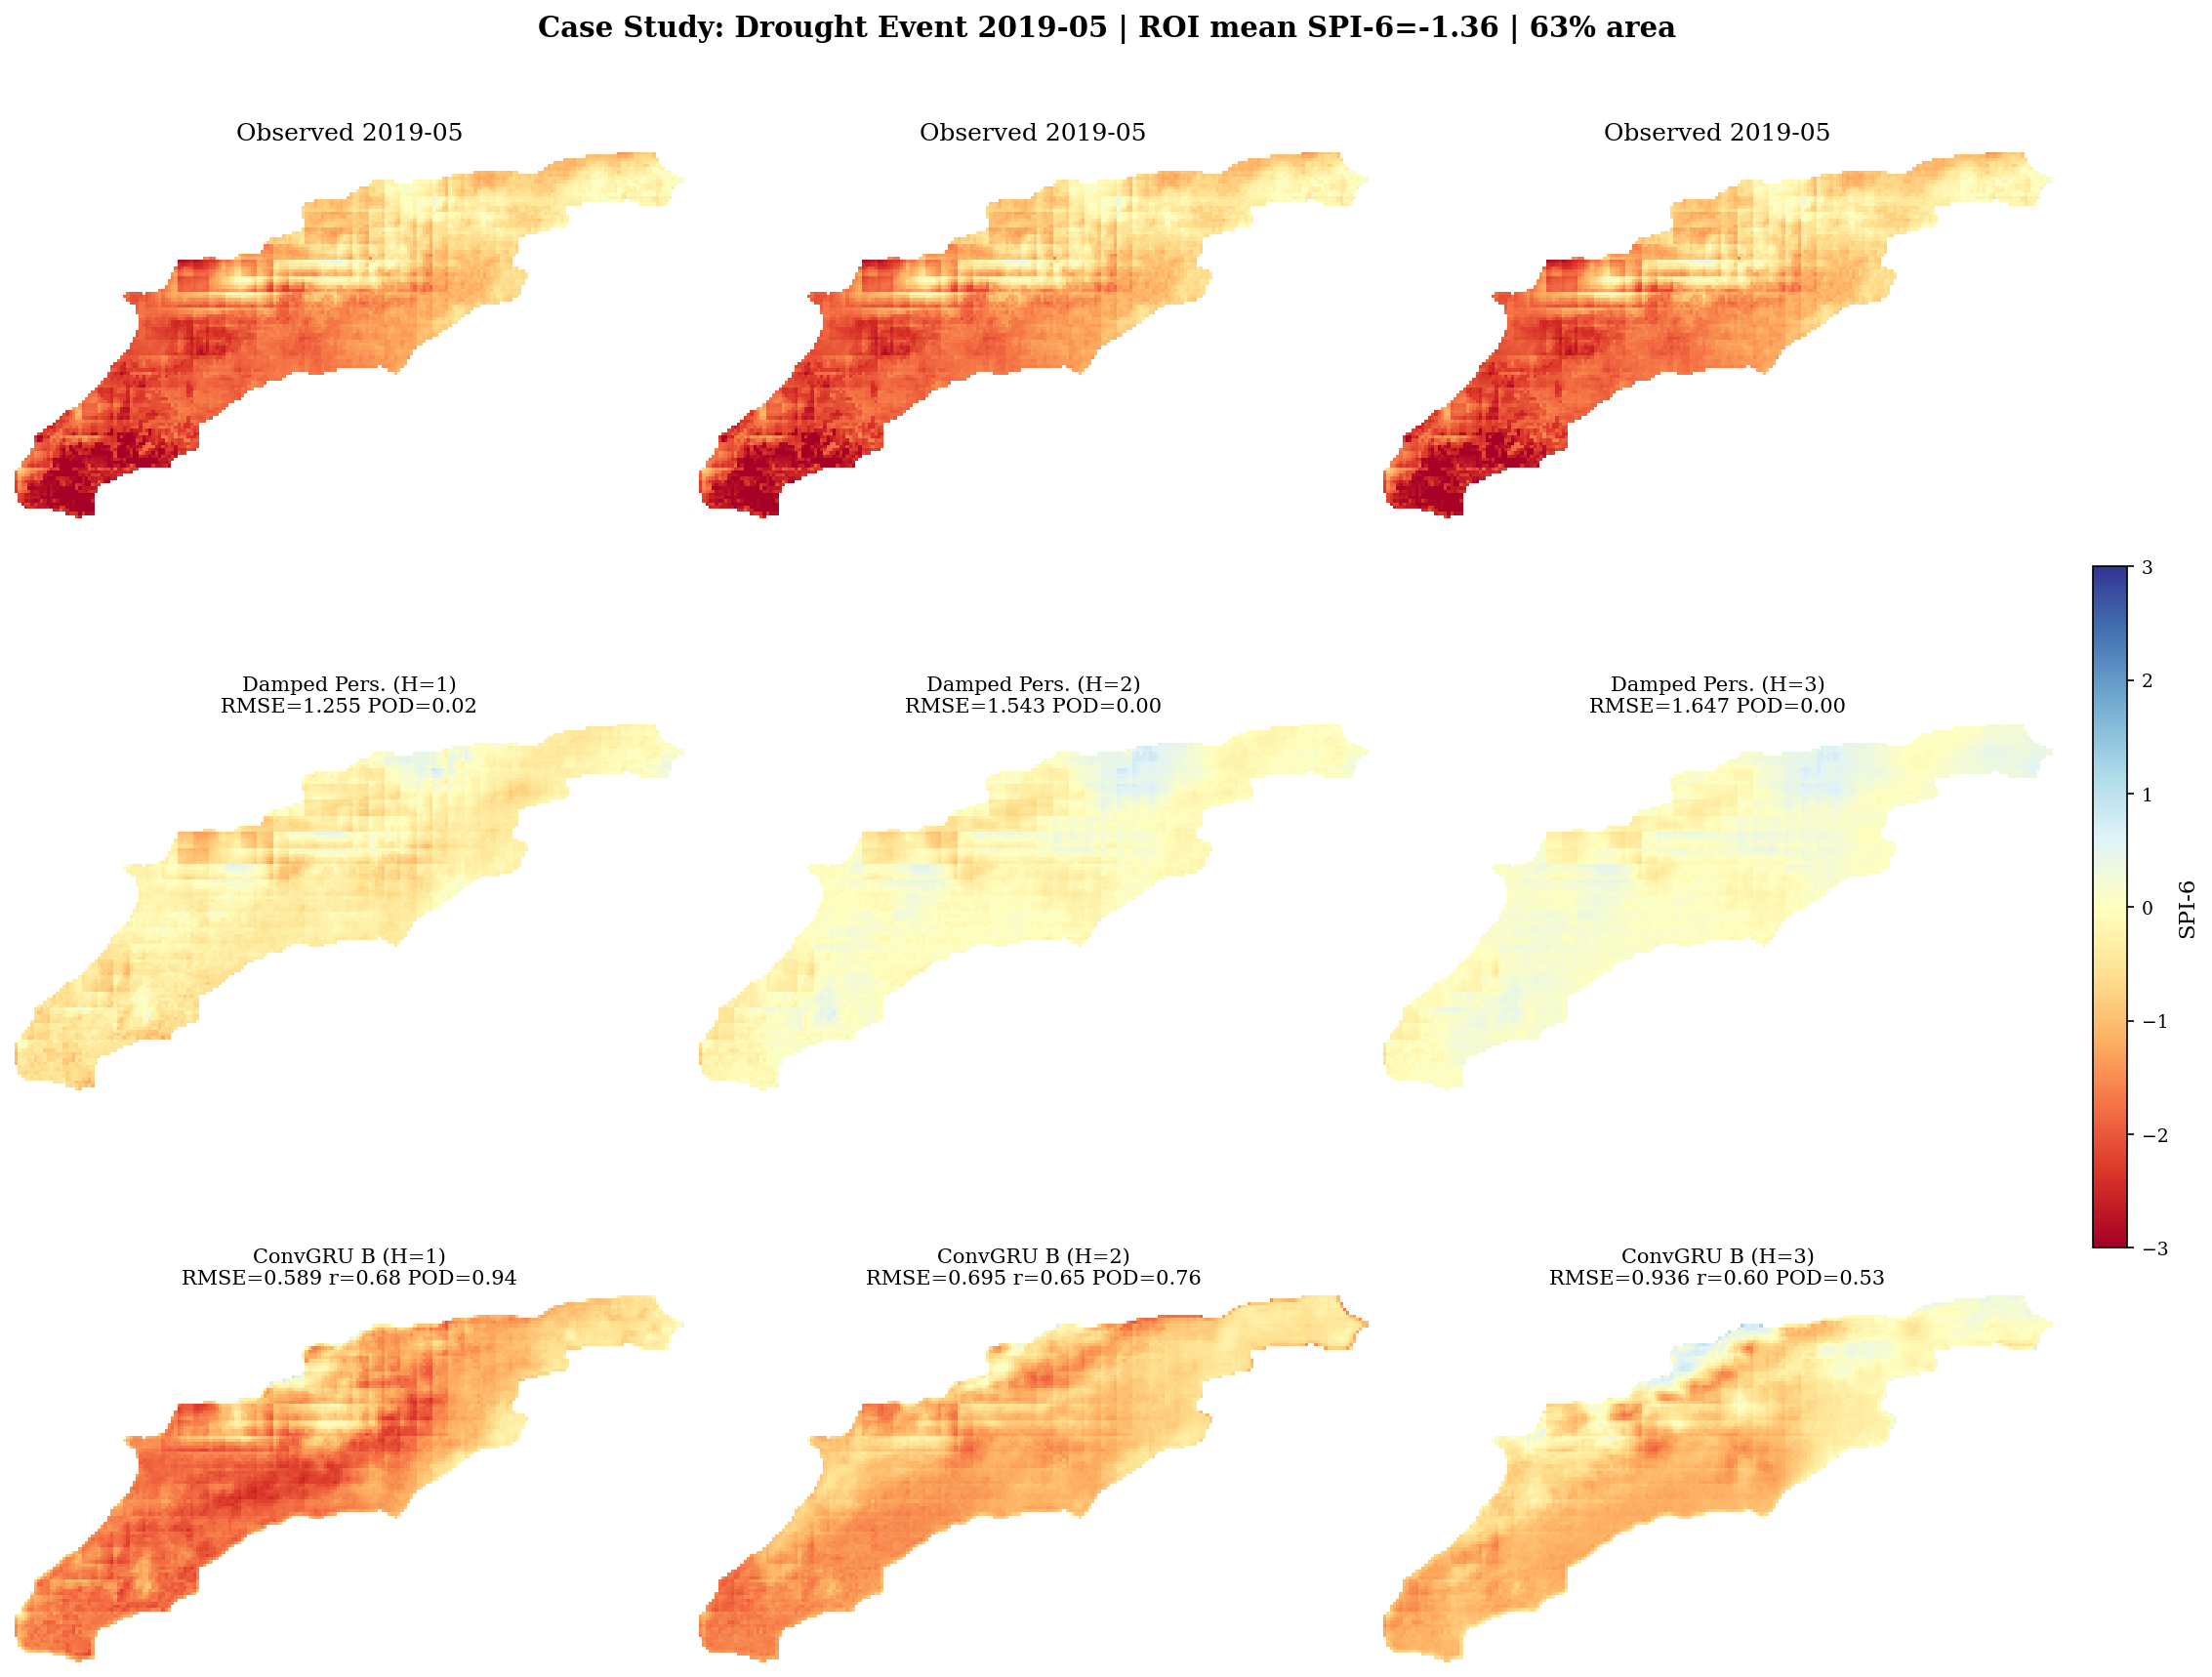 |
| --- |
| 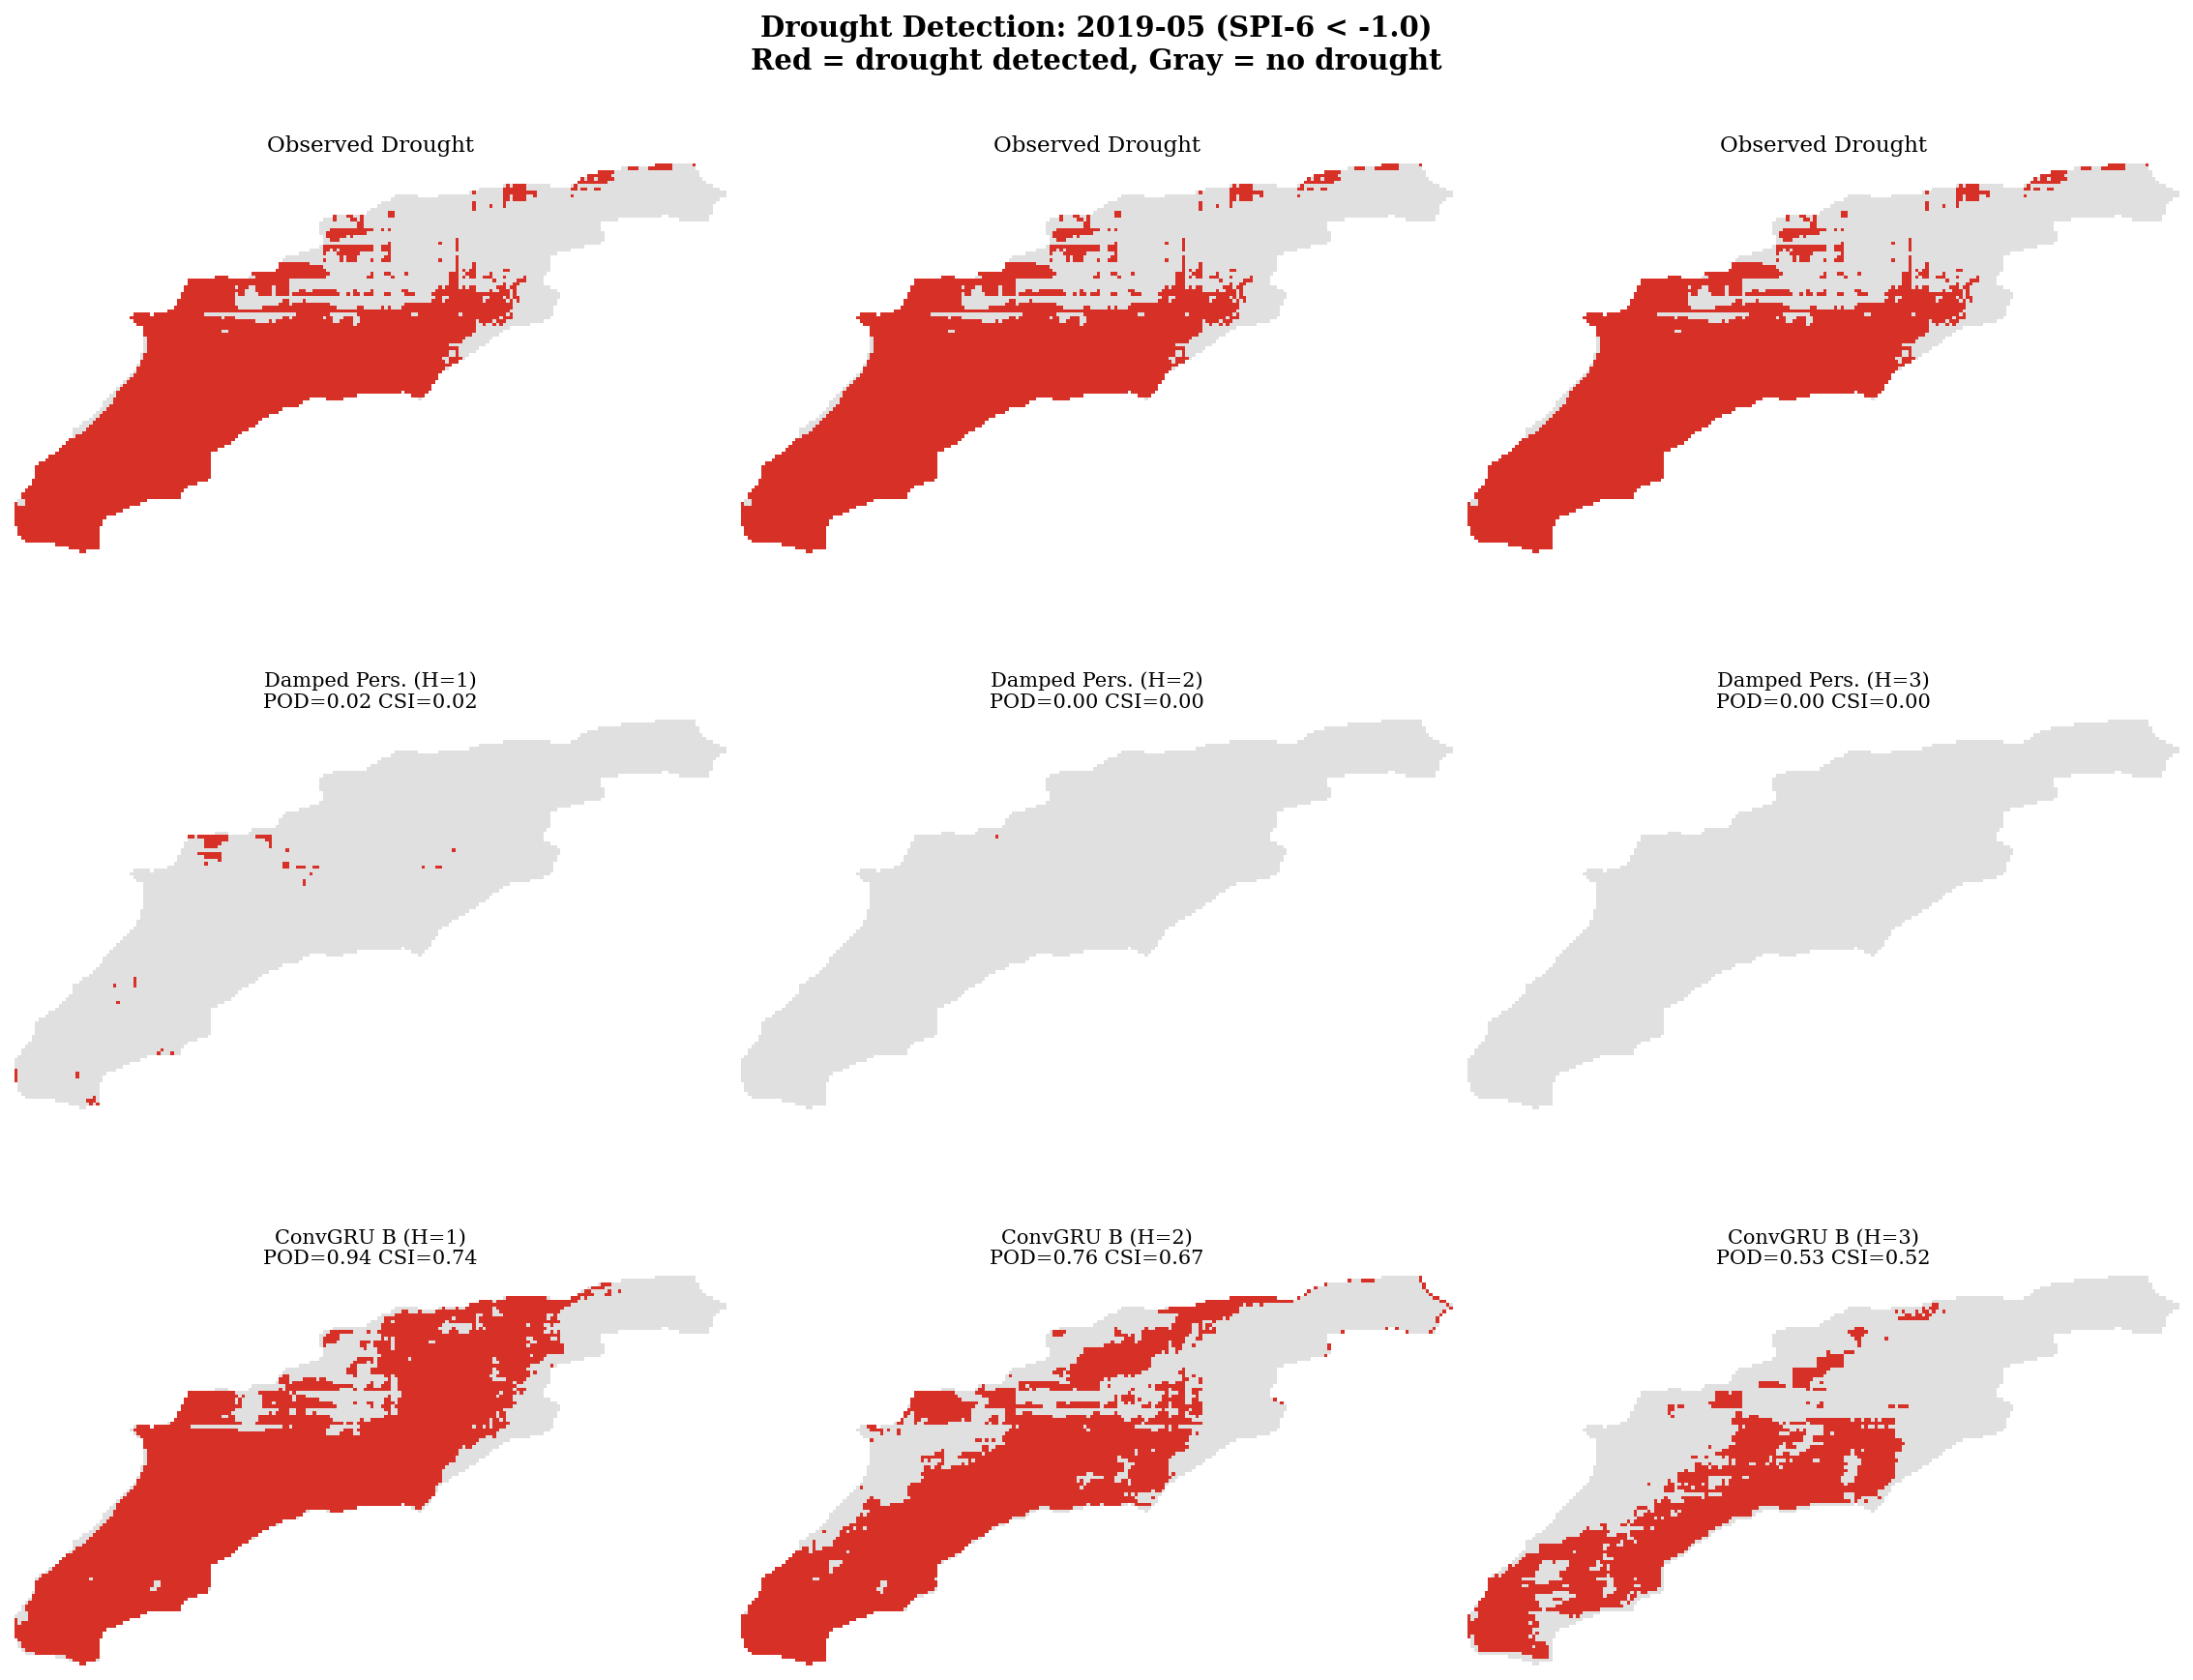 |
| 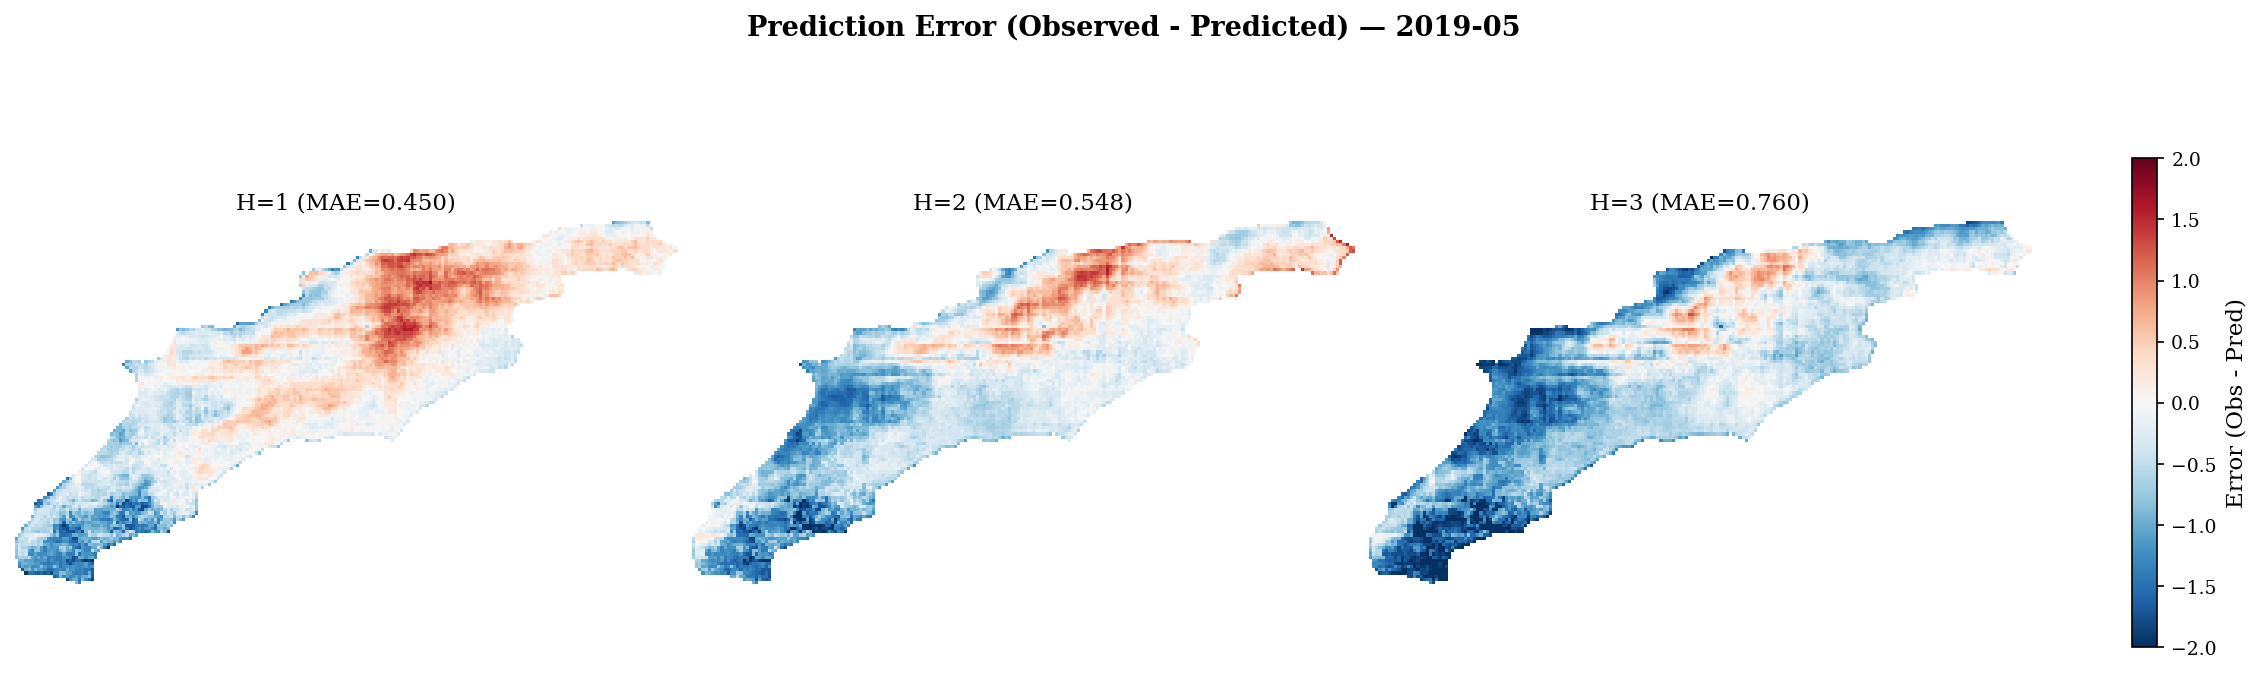 |
| **Figure S3.** Case study: May 2019 drought event (validation period, ROI-mean SPI-6 = -1.36, 63% area under moderate drought). (A) Continuous SPI-6 fields: observed (top row), damped-persistence predictions (middle row), and ConvGRU predictions (bottom row) at H = 1, 2, and 3. Per-panel metrics (RMSE, correlation, POD) are annotated. (B) Binary drought detection (SPI-6 < -1.0): same layout, with per-panel POD and CSI annotated. The ConvGRU detects 90% of the drought area at H = 1 (POD = 0.90, CSI = 0.79), while damped persistence detects less than 2% at all lead times. |

| 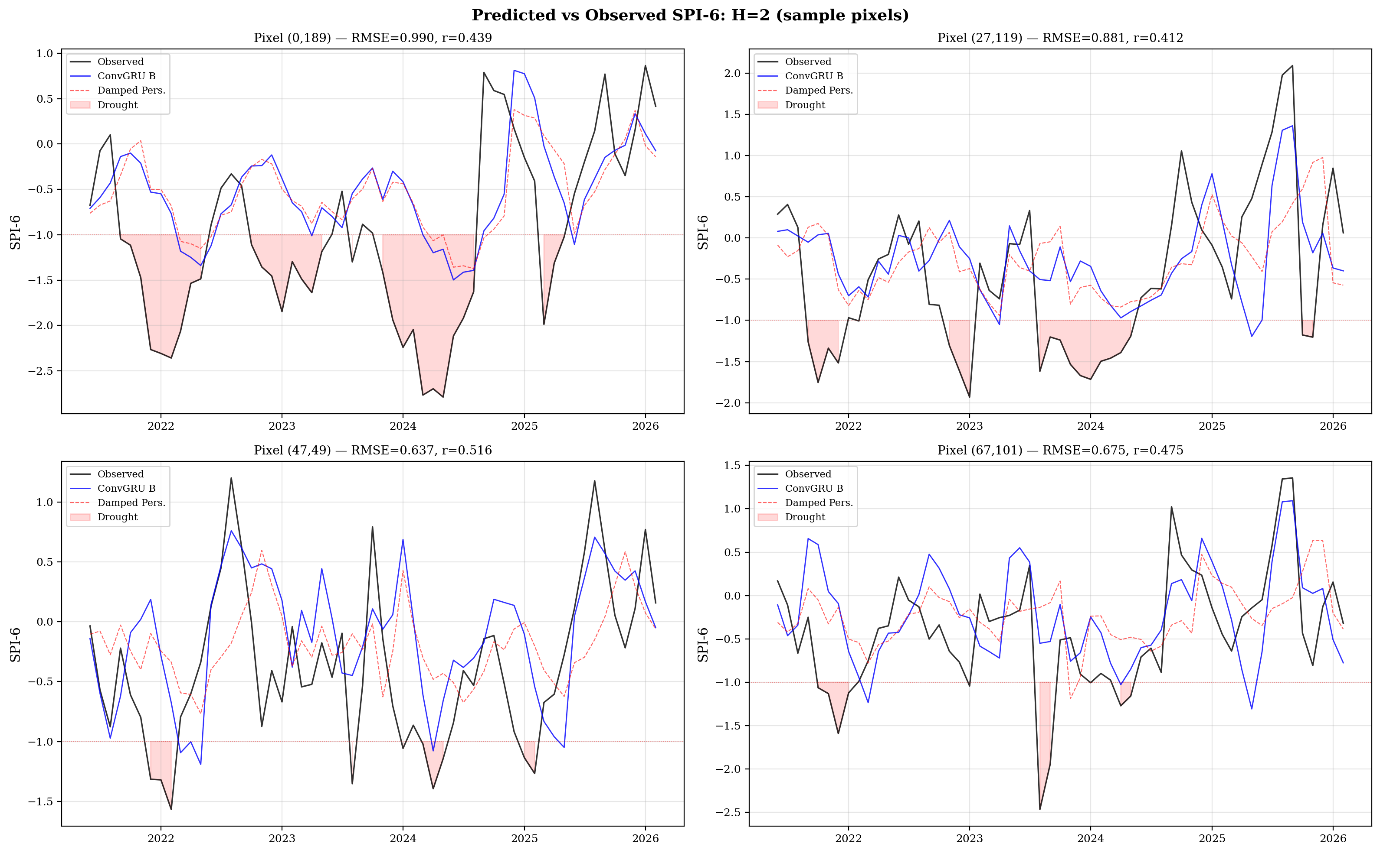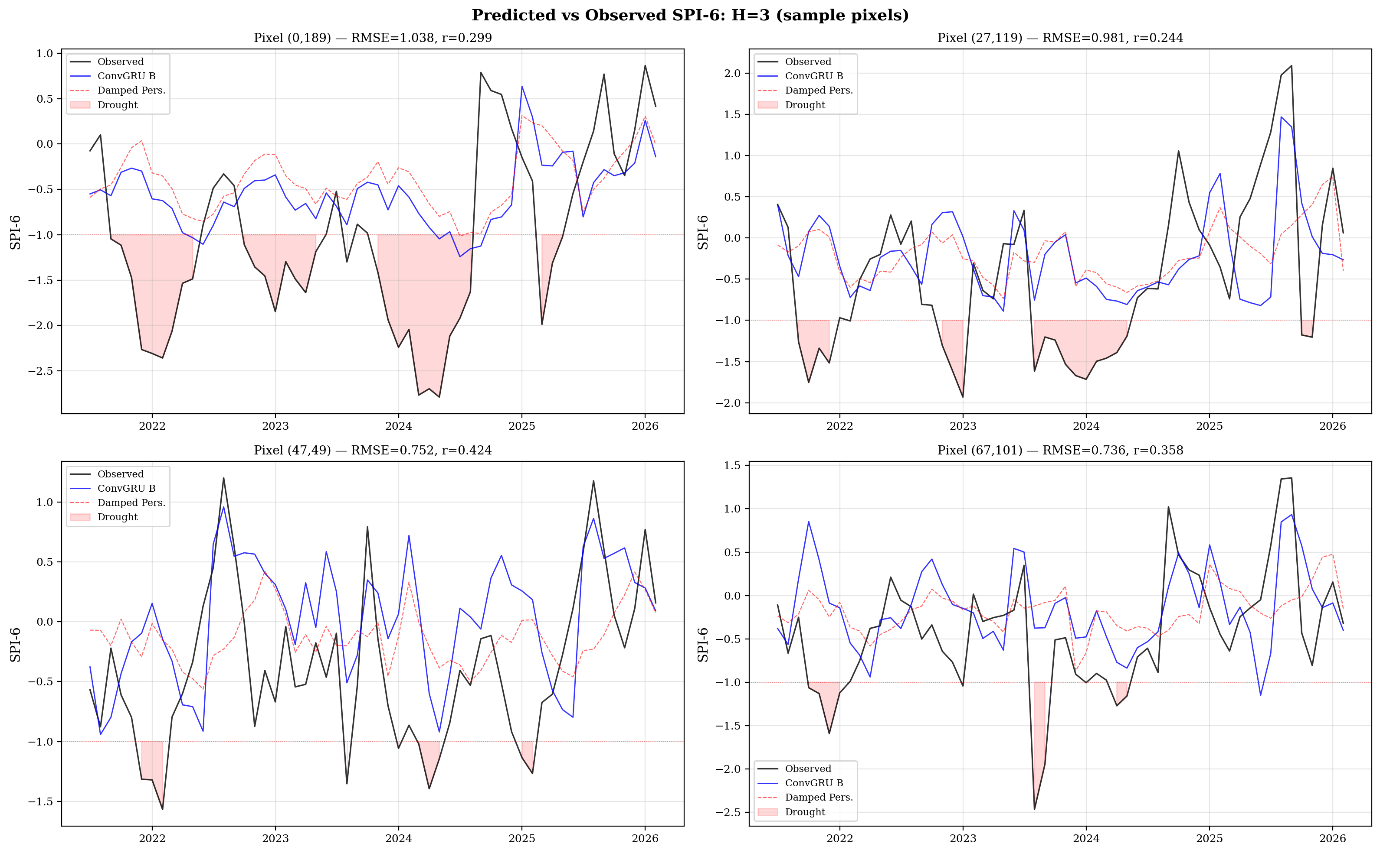 |
| --- |
| **Figure S4.** Predicted versus observed SPI-6 time series at four representative pixels for H = 2 and H = 3. Black: observed; blue: ConvGRU; red dashed: damped persistence. Pink shading indicates observed drought periods (SPI-6 < -1.0). Per-pixel RMSE and correlation are shown above each panel. Forecast skill degrades with increasing lead time, consistent with the predictability boundary established in the main text. |
